# Supplementary material
Source: Springer Nature journal article supplement (https://www.springermedizin.de/resource/supplementary/12891_2014_2196_MOESM7_ESM.pdf/9509598)
Supplement: MOESM7 [file 9509598]

## 24 hours post surgery

### Pain at rest

### Pain during activity

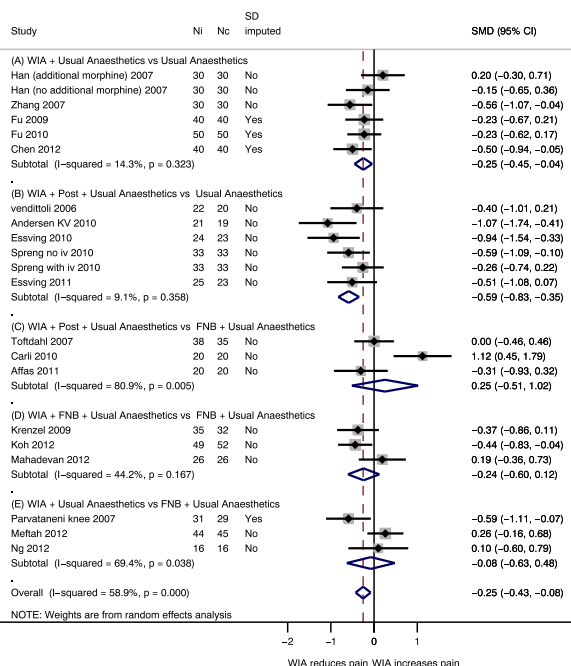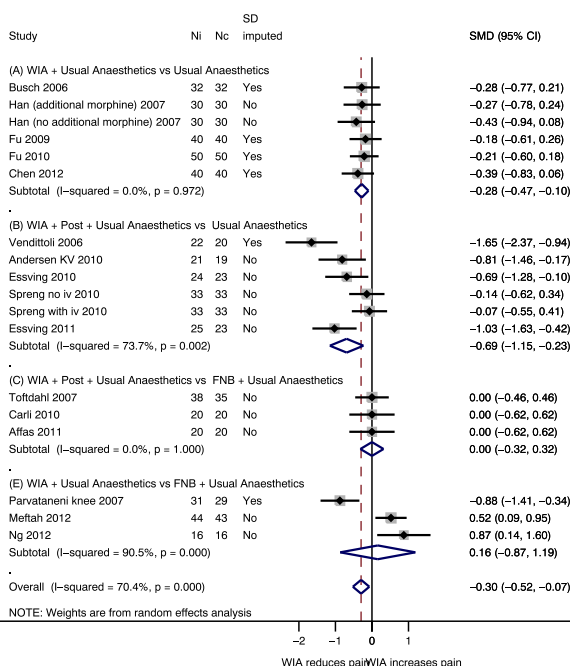

## 48 hours post surgery

### Pain at rest

### Pain during activity

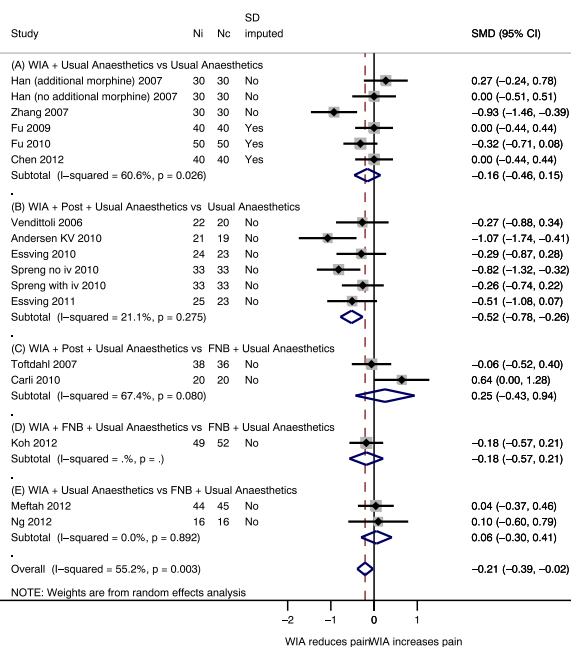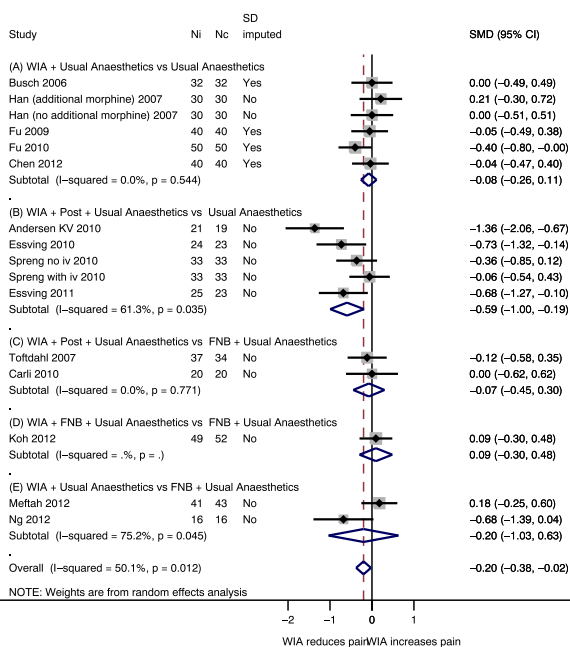

Standardized mean difference in pain
